# Supplementary material for: Structure of ubiquitylated-Rpn10 provides insight into its autoregulation mechanism
Source: PubMed Central journal article supplement (PMC5059453; doi:10.1038/ncomms12960), 2016-10-04
Supplement: ncomms12960-s1.pdf [file ncomms12960-s1.pdf]

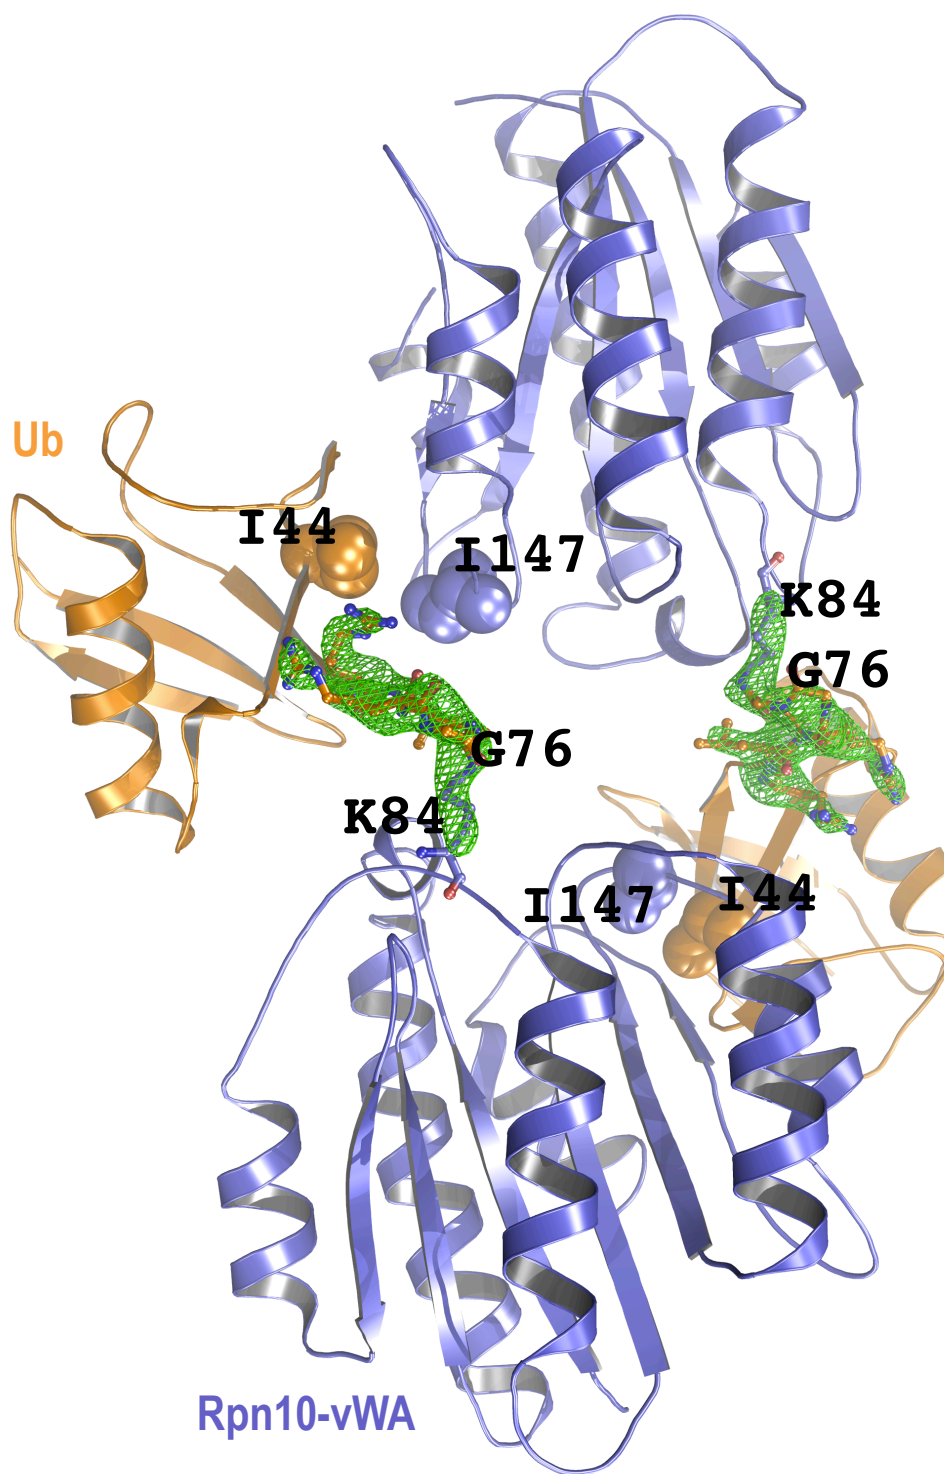

**Supplementary Figure 2.** Assessment of model biased by simulated annealing omit map. A simulated-annealing refinement of partial structure in which the Ub C-terminus segment [(residues R72-G76) and the residue atoms of K84 (C $\beta$ , C $\gamma$ , C $\delta$ , C $\epsilon$  and N $\zeta$ )] were omitted, was performed<sup>16</sup>.  $\sigma_A$ -weighted *mFo-DFc* electron density omit-map was calculated and presented in  $3\sigma$  level. The last refined model is presented.

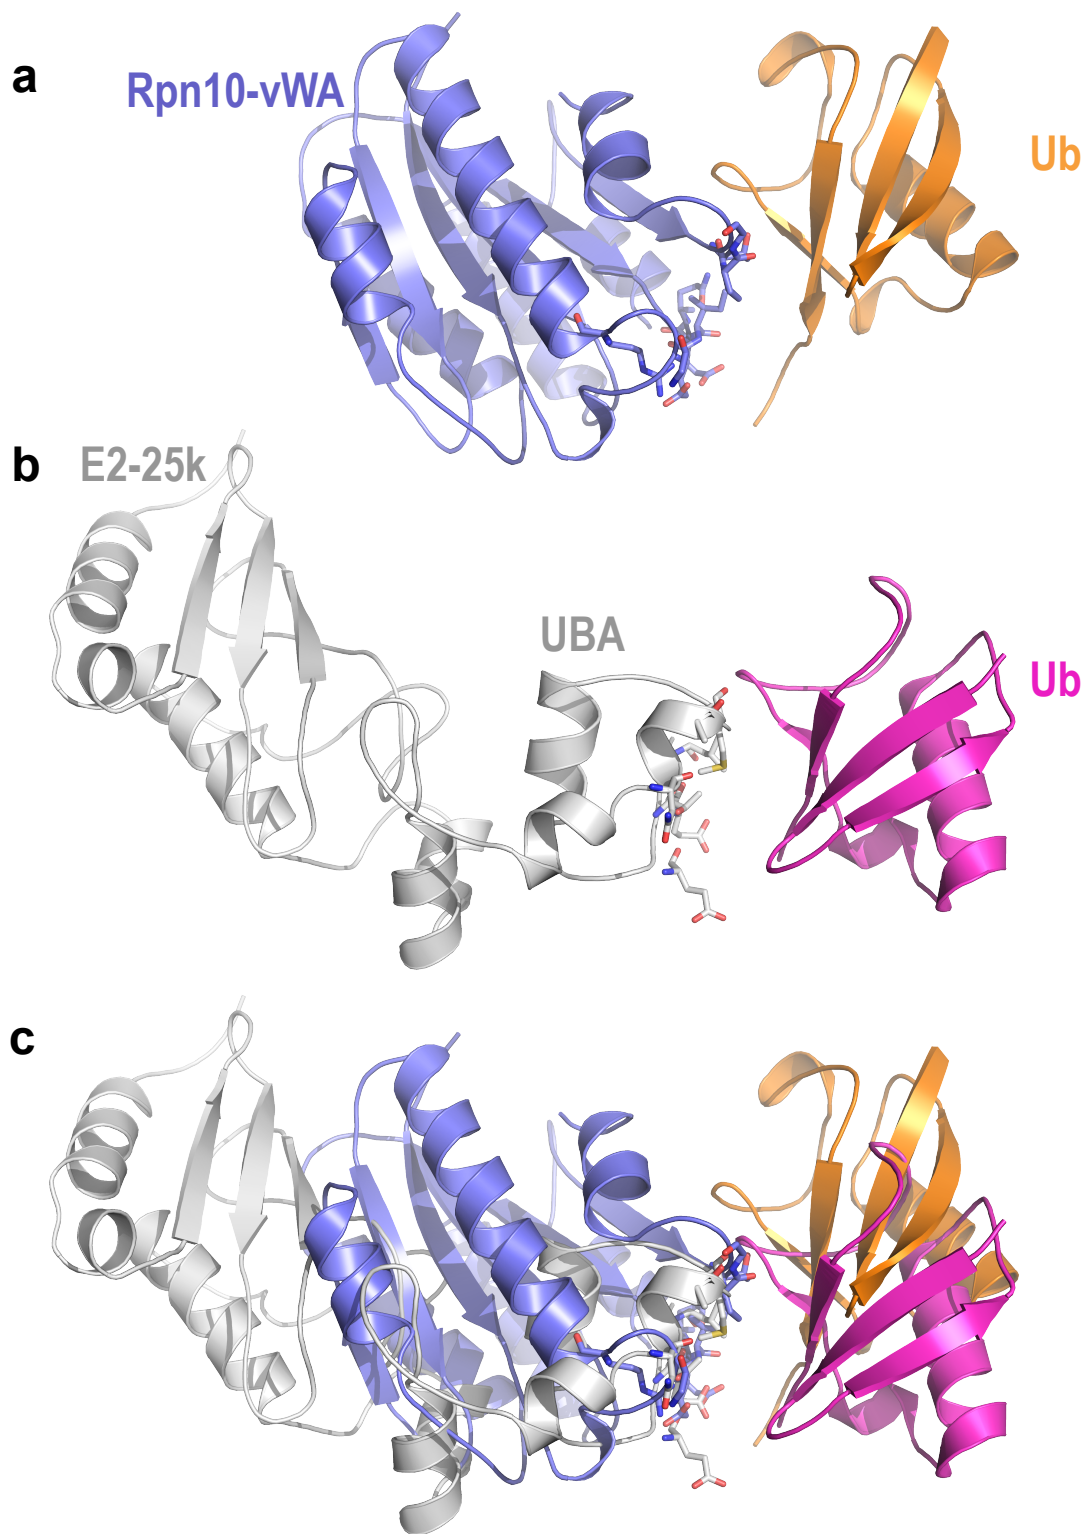

**Supplementary Figure 3. Structure-based *in silico* procedure for identification of Ub-binding domains highlights the Ub binding patch on Rpn10-vWA domain.** Using the structure of E2-25kDa complex with Ub (PDB 3K9P) as searching probe for Ub-binding sites on the vWA structure yielded a very similar binding mode to the one found in the non-covalent structure at the crystal lattice. a. shows the non-covalent structure of vWA:Ub. b. shows the non-covalent complex of E2-25k with Ub. c. Shows superimposition of the structures based on the *in silico* procedure (see Supplementary Fig. S3 for molecular details)

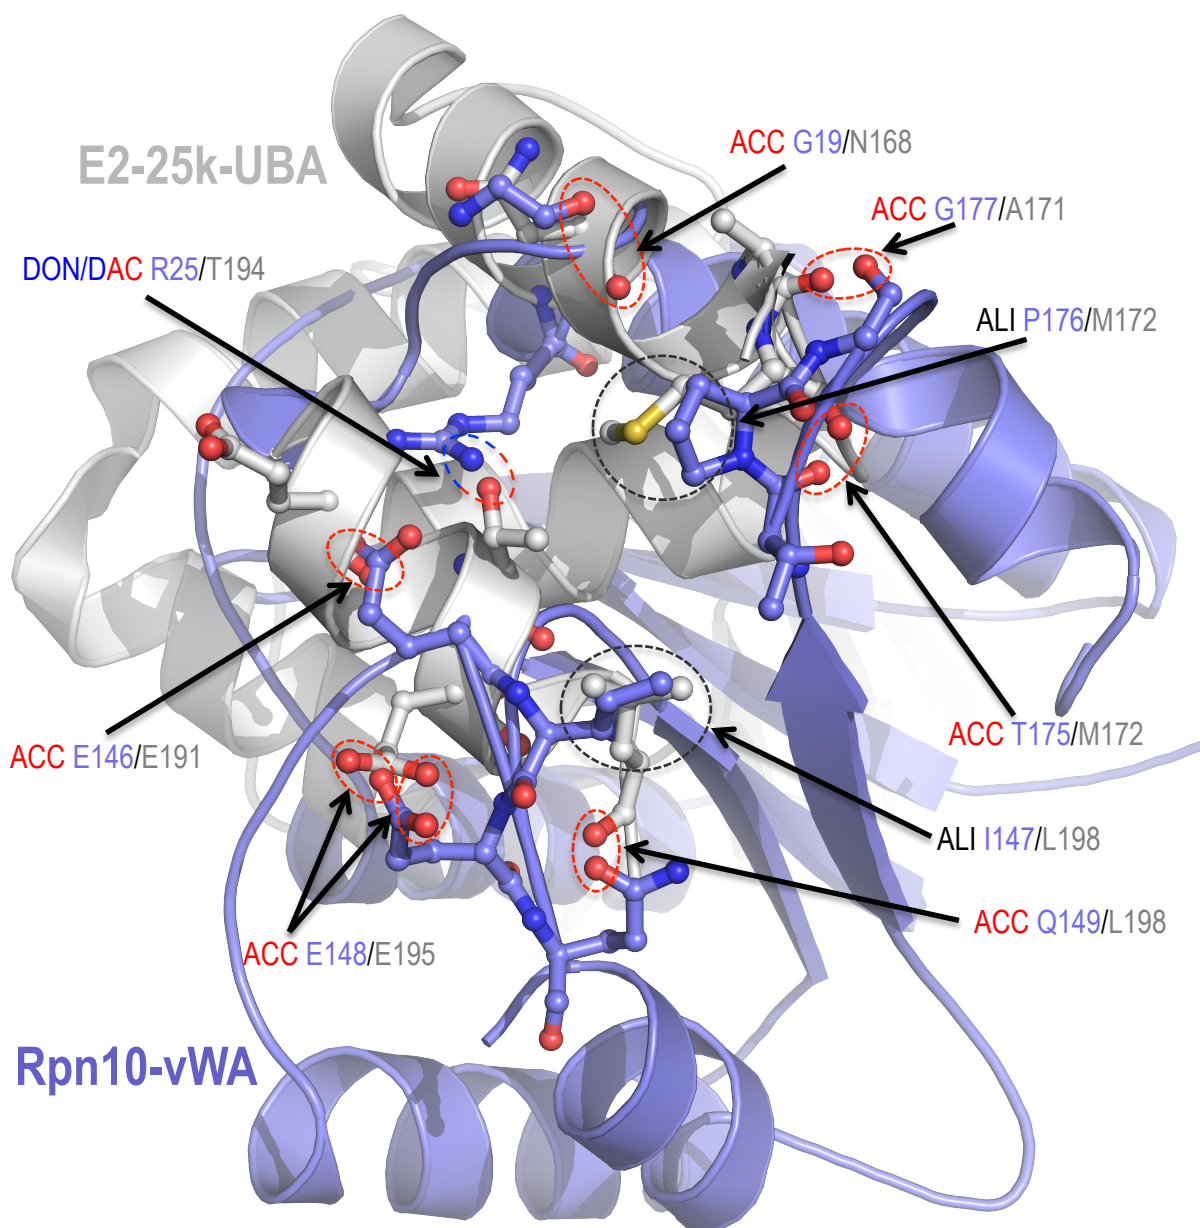

Rigid Transformation: -1.44662 -0.362251 0.387384 -2.43399 -20.2258 41.095

Similarity Score: 4187.62      rmsd: 0.692565      Match Size: 10

| Chain.ID | Amino Acid | Property | Source | Chain.ID | Amino Acid | Property | Source | Dist. | Conserved AA |
|----------|------------|----------|--------|----------|------------|----------|--------|-------|--------------|
| A.19     | Gly        | ACC      | b      | A.168    | Asn        | ACC      | b      | 2.6   |              |
| A.25     | Arg        | DON      | s      | A.194    | Thr        | DAC      | b      | 1.1   |              |
| A.146    | Glu        | ACC      | s      | A.191    | Glu        | ACC      | b      | 1.3   | *            |
| A.147    | Ile        | ALI      | s      | A.198    | Leu        | ALI      | b      | 0.39  |              |
| A.148    | Glu        | ACC      | s      | A.195    | Glu        | ACC      | b      | 1.7   | *            |
| A.148    | Glu        | ACC      | s      | A.195    | Glu        | ACC      | b      | 1.1   | *            |
| A.149    | Gln        | ACC      | s      | A.198    | Leu        | ACC      | b      | 1     |              |
| A.175    | Thr        | ACC      | b      | A.172    | Met        | ACC      | b      | 1.4   |              |
| A.176    | Pro        | ALI      | s      | A.172    | Met        | ALI      | b      | 1.4   |              |
| A.177    | Gly        | ACC      | b      | A.171    | Ala        | ACC      | b      | 1.3   |              |

**Supplementary Figure 4. Detailed *in silico* analysis highlights the Ub binding patch on vWA.** Using the structure of E2-25kDa complex with Ub (PDB 3K9P) as searching probe for Ub binding sites on the Rpn10-vWA domain yielded a very similar binding mode to the one found in the non-covalent vWA:Ub crystal structure. Superimposition of the structures based on the *in silico* procedure highlights the aligned physico-chemical properties. The table provides an alphanumeric presentation of the aligned physico-chemical properties found in vWA with respect to the UBA domain of the E2-25kDa. ACC, acceptor; DON, donor; DAC, donor/acceptor; and ALI, aliphatic.



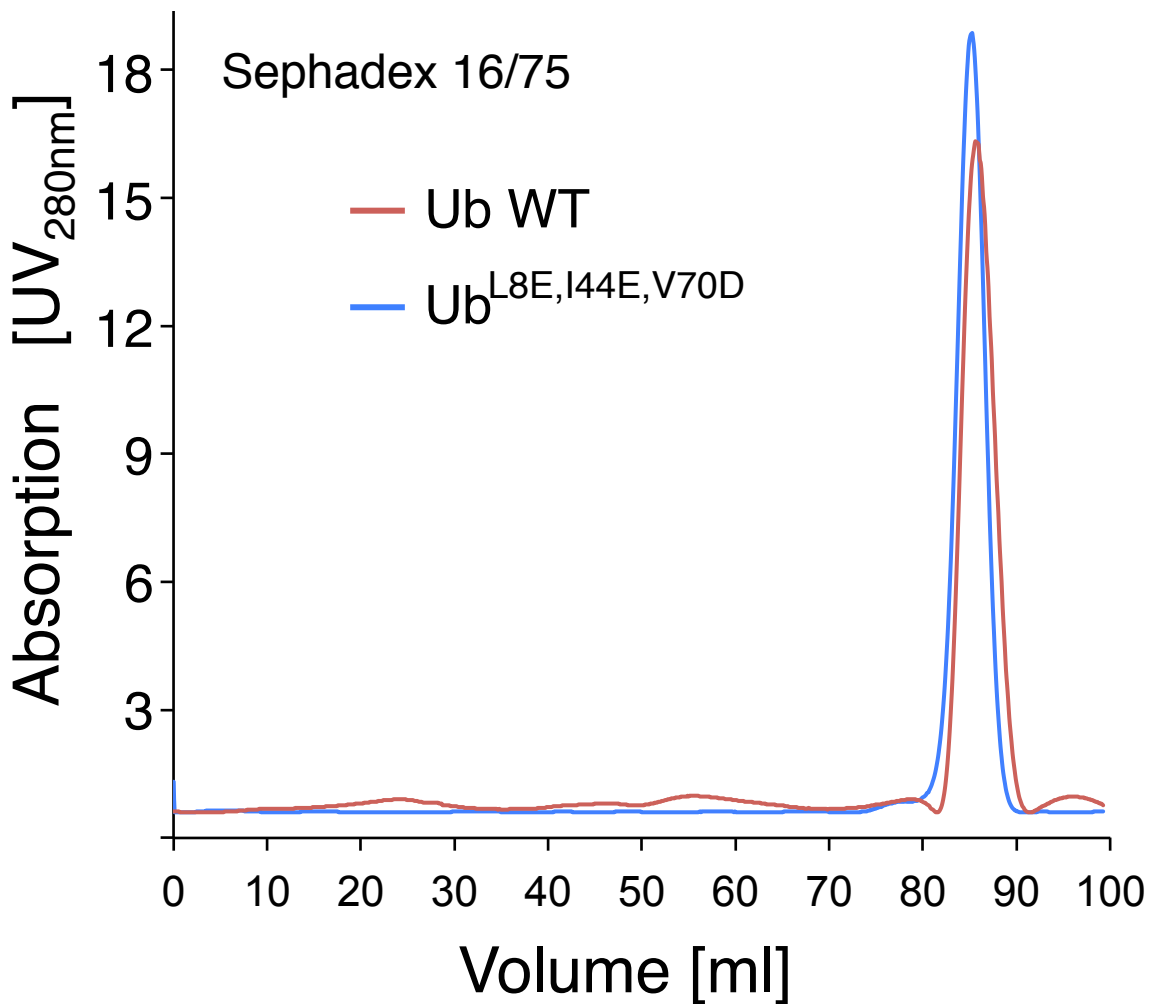

**Supplementary Figure 5. The ubiquitin triple mutant at the hydrophobic patch is properly fold.** Size Exclusion Chromatography (SEC) analyses of wild (red) type and L8E,I44E,V70D triple mutant (blue) of Ub proteins are shown. Purified proteins were concentrated to about 15 mg/ml in 150 mM NaCl 50 mM Tris-HCl pH 8.0. Five ml of each protein were loaded onto SEC column (Sephadex 16/75) and run at 1 ml/min using Akta Prim. The monitored optical density absorption at UV<sub>280 nm</sub> is shown.

**a****Ub-K84**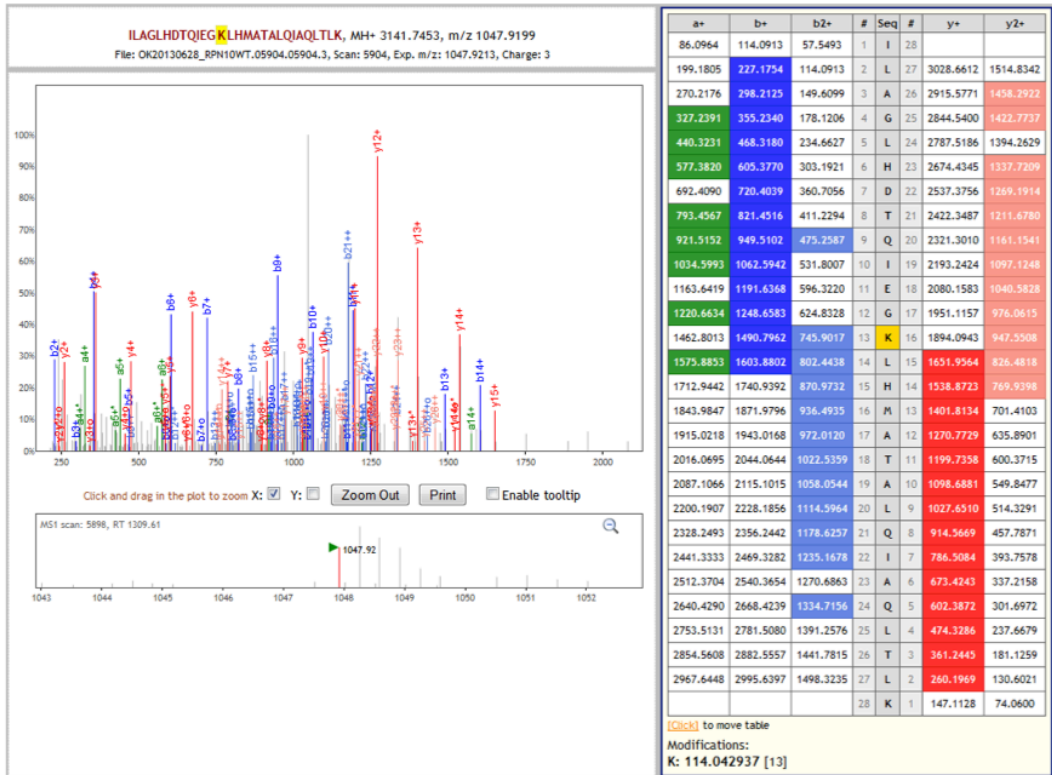**b****Ub-K84+Ox-M87**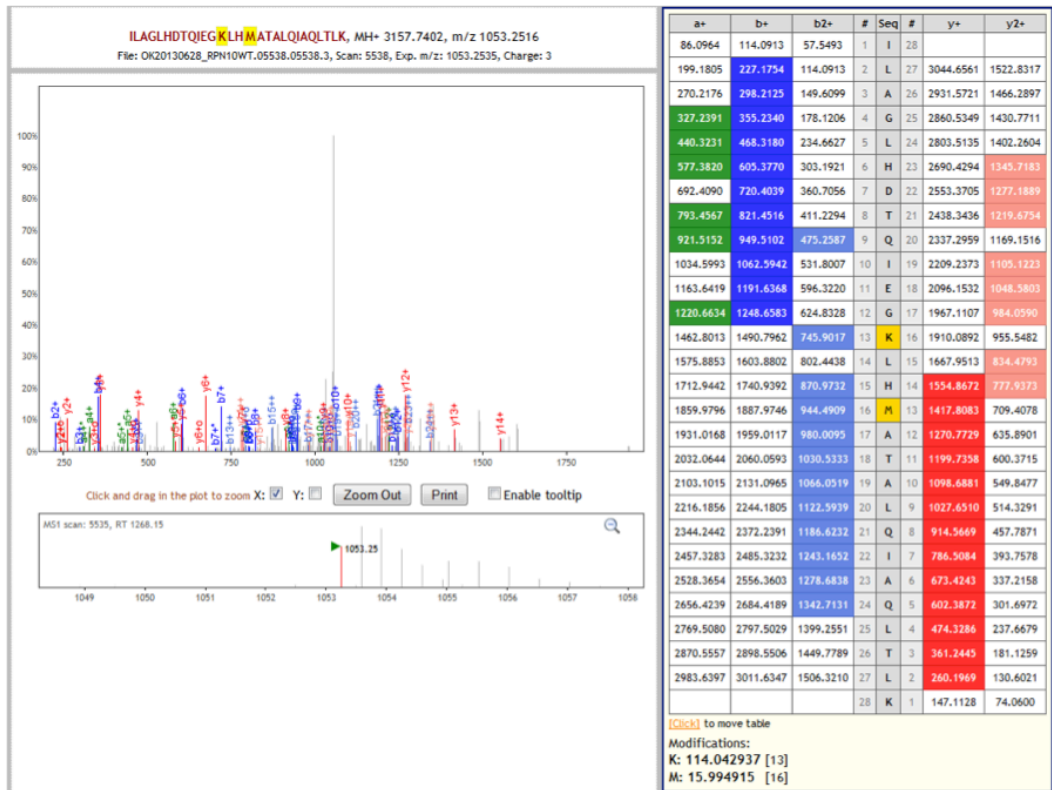

**Supplementary Figure 6. MS/MS analysis of Rpn10 peptides.** (a) The MS/MS spectrum of Rpn10 peptides containing K84 with a di-glycine (KGG) tag. (b) The MS/MS spectrum of Rpn10 peptides containing K84 with di-glycine (KGG) tag and Oxy-Met. The precursor peptide ions were isolated and fragmented in an LTQ mass spectrometer. Fragmentation ions from both termini are shown (b- and y-ions, respectively), where the detected fragmentation ions are colored in red (y-ions) and blue (b-ions).

***His<sub>6</sub>-Ub-GST-Rpn10 WT***

| Ubiquitylation site | Peptide count |
|---------------------|---------------|
| K71                 | 1             |
| K84                 | 14            |
| K99                 | 1             |
| K268                | 5             |
| Total               | 21            |

***His<sub>6</sub>-Ub-GST-Rpn10 mutant***

| ubiquitylation site | Peptide count |
|---------------------|---------------|
| K268                | 3             |
| Total               | 3             |

***Ub-Rpn10 WT***

| ubiquitylation site | Peptide count |
|---------------------|---------------|
| K71                 | 1             |
| K84                 | 20            |
| K99                 | 0             |
| K268                | 5             |
| Total               | 26            |

***Ub-Rpn10 mutant***

| ubiquitylation site | Peptide count |
|---------------------|---------------|
| K268                | 2             |
| Total               | 2             |

**Supplementary Figure 7. List of detected peptides in MS experiments.** The number and location of GG-peptides corresponding to the ubiquitylation sites on Rpn10 WT and mutant protein that were detected in MS experiments is shown.

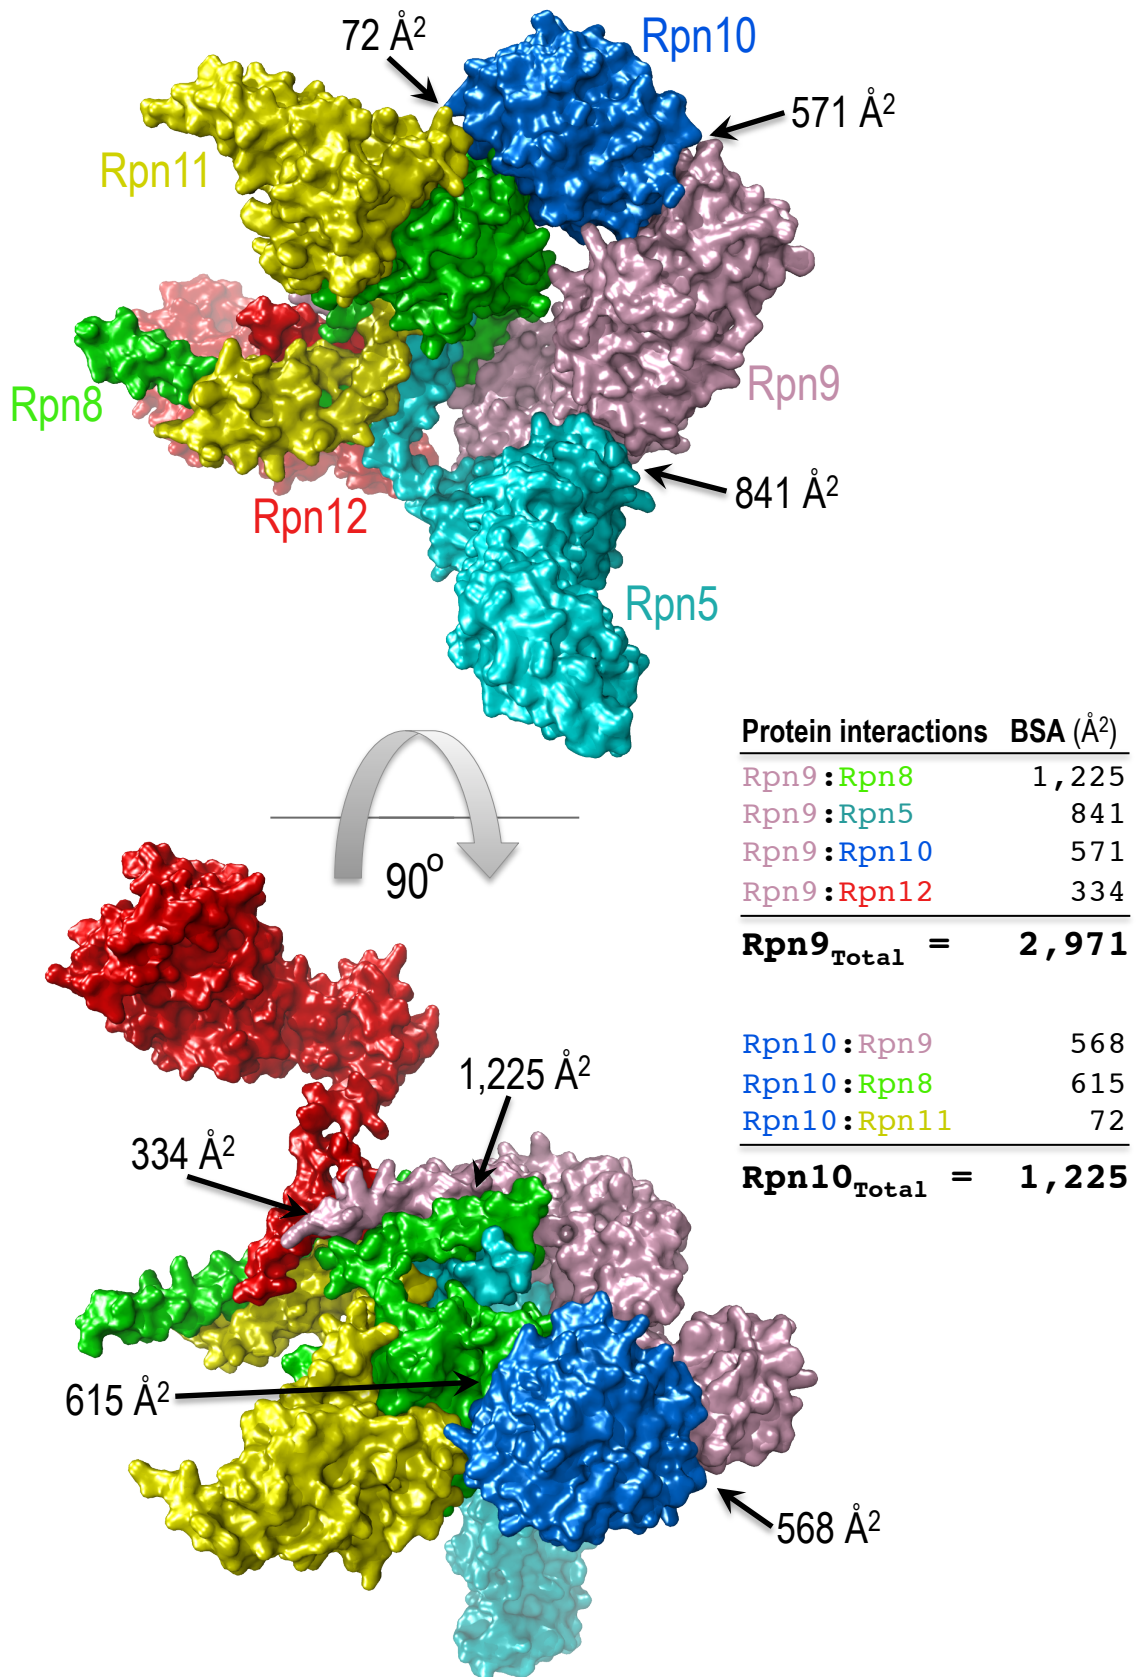

**Supplementary Figure 8. Buried Surface Area (BSA) formed by the interactions of Rpn10 and Rpn9 with their neighbors.** BSA were calculated using the PISA server at

[http://www.ebi.ac.uk/msd-srv/prot\\_int/cgi-bin/piserver](http://www.ebi.ac.uk/msd-srv/prot_int/cgi-bin/piserver)

The coordinates of the proteasome EM structure 4CR2 were used as input for the PISA analysis. The surfaces of Rpn10, Rpn9 and their neighbors are presented with the indicated colors.

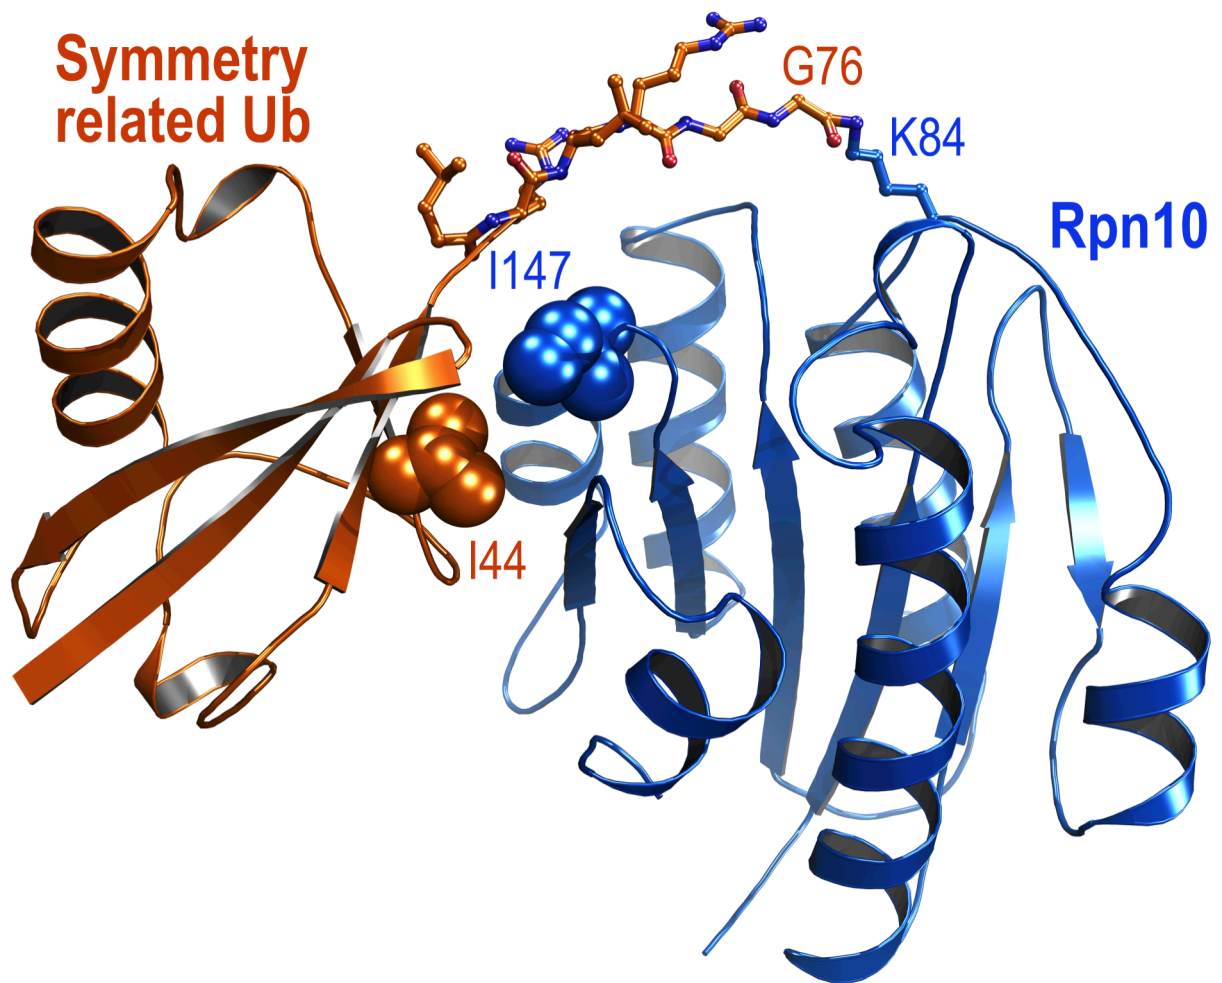

**Supplementary Figure 9.** The carboxyl terminus tail of the non-covalent bound Ub at the crystallographic symmetry can interact with K84 to form an isopeptide bond



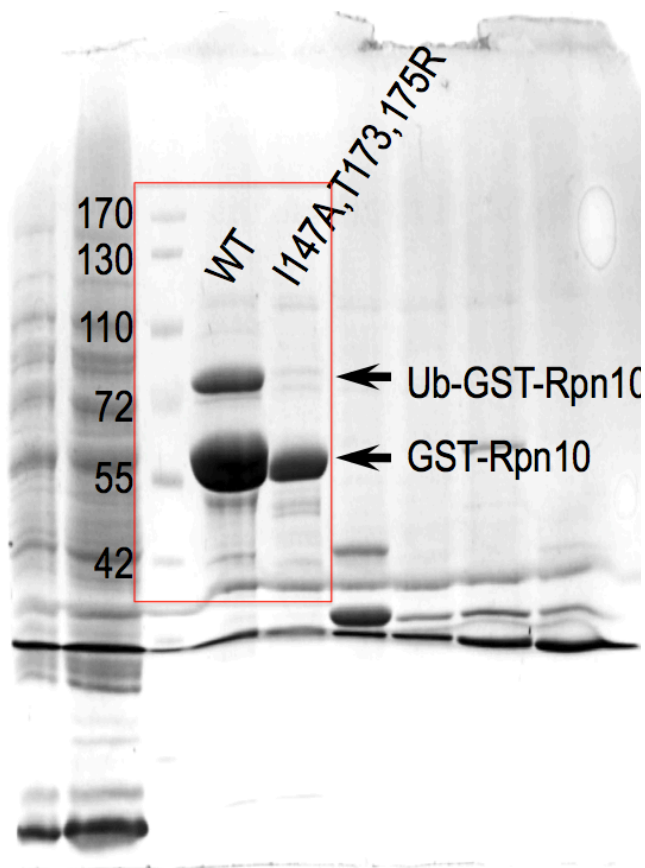

Fig. 3g

**Supplementary Figure 10.** Uncropped image of representative original Coomassie-blue stained SDS-PAGE. Red boxes indicate the cropped area displayed in the indicated figure.

Supplementary table 1: List of plasmids used in this study

| Name <sup>a</sup> | Ori <sup>b</sup> | Resistance       | Promoter | Construct                                                                                  | Source         |
|-------------------|------------------|------------------|----------|--------------------------------------------------------------------------------------------|----------------|
| pCOG6             | ColE1            | Amp <sup>c</sup> | Ptac     | pGST-Rpn10-FL <sup>Sc</sup>                                                                | Lab collection |
| pCOG30            | ColE1            | Amp              | T7       | pET43.1-NusA-Rsp5 <sub>(109-809)</sub> <sup>Sc</sup>                                       | Lab collection |
| pCOG31            | CloDF13          | Sm <sup>d</sup>  | T7       | pCDF-MBP-Rpn10 <sup>Sc</sup>                                                               | Lab collection |
| pCOG33            | CloDF13          | Sm               | T7       | pCDF-His <sub>6</sub> -MBP-Rsp5 <sup>Sc</sup>                                              | Lab collection |
| pCOG34            | ColE1            | Amp              | Ptac     | pGST-par2-VWA <sub>1-189</sub> <sup>Sc</sup>                                               | This work      |
| pCOG35            | ColE1            | Amp              | Ptac     | pGST-par2-VWA <sub>1-189, T173R, T175R</sub> <sup>Sc</sup>                                 | This work      |
| pCOG36            | ColE1            | Amp              | Ptac     | pGST-par2-VWA <sub>1-189, I147A</sub> <sup>Sc</sup>                                        | This work      |
| pCOG37            | ColE1            | Amp              | Ptac     | pGST-par2-VWA <sub>1-189, Q149A</sub> <sup>Sc</sup>                                        | This work      |
| pCOG38            | ColE1            | Amp              | Ptac     | pGST-par2-VWA <sub>1-189, Q149R</sub> <sup>Sc</sup>                                        | This work      |
| pCOG39            | ColE1            | Amp              | Ptac     | pGST-par2-Rpn10 <sub>190-268</sub> <sup>Sc</sup>                                           | This work      |
| pCOG63            | ColE1            | Amp              | Ptac     | pGST-Rpn10-FL <sub>I147A, T175R, T173R</sub> <sup>Sc</sup>                                 | This work      |
| pCOG70            | ColE1            | Kan <sup>e</sup> | T7       | pHis <sub>6</sub> -par2-Rpn9 <sup>Sc</sup>                                                 | This work      |
| pCOG71            | ColE1            | Kan              | T7       | pHis <sub>6</sub> -par2-Rpn12 <sup>Sc</sup>                                                | This work      |
| pCOG72            | ColE1            | Kan              | T7       | pHis <sub>6</sub> -Dsk2-UbL <sup>Sc</sup>                                                  | Glickman lab   |
| pGEN4             | ColE1            | Kan              | T7       | pHis <sub>6</sub> -par2-Ub <sup>Hs</sup> /Ubc4 <sup>Sc</sup> /Uba1 <sup>Ta</sup>           | Lab collection |
| pGEN24            | ColE1            | Tet <sup>f</sup> | T7       | pHis <sub>6</sub> -par2-Ub <sup>Hs</sup> /Ubc4 <sup>Sc</sup> /Uba1 <sup>Ta</sup>           | Lab collection |
| pGEN25            | ColE1            | Kan              | T7       | pHis <sub>6</sub> -par2-Ub <sup>Hs</sup>                                                   | Lab collection |
| pGEN33            | ColE1            | Amp              | T7       | pHis <sub>6</sub> -par1-Ub <sub>L8E, I44E, V70D</sub> <sup>Hs</sup>                        | Lab collection |
| pGEN35            | ColE1            | Kan              | T7       | par2-Ub <sup>Hs</sup>                                                                      | Lab collection |
| pCD-Sub13         | CloDF13          | Sm               | pLtetO1  | pCDF- cDHFR-link2-His <sub>6</sub> -Rpn10 <sup>Sc</sup>                                    | This work      |
| pCD-Sub19         | CloDF13          | Sm               | pLtetO1  | pCDF- cDHFR-link2-His <sub>6</sub> -MBP-Rpn10 <sub>1-189</sub> <sup>Sc</sup>               | This work      |
| pCD-Sub40         | CloDF13          | Sm               | pLtetO1  | pCDF- cDHFR-link1-His <sub>6</sub> -Rpn10 <sub>190-268</sub> <sup>Sc</sup>                 | This work      |
| pCD-Sub72         | CloDF13          | Sm               | pLtetO1  | pCDF- cDHFR-link2-His <sub>6</sub> -MBP-Rpn10 <sub>1-189, T173R, T175R</sub> <sup>Sc</sup> | This work      |
| pCD-Sub73         | CloDF13          | Sm               | pLtetO1  | pCDF- cDHFR-link2-His <sub>6</sub> -MBP-Rpn10 <sub>1-189, I147R</sub> <sup>Sc</sup>        | This work      |
| pCD-Sub74         | CloDF13          | Sm               | pLtetO1  | pCDF- cDHFR-link2-His <sub>6</sub> -MBP-Rpn10 <sub>1-189, Q149R</sub> <sup>Sc</sup>        | This work      |

| Name <sup>a</sup> | Ori <sup>b</sup> | Resistance | Promoter | Construct                                                                                                  | Source         |
|-------------------|------------------|------------|----------|------------------------------------------------------------------------------------------------------------|----------------|
| pCD-Sub75         | CloDF13          | Sm         | pLtetO1  | pCDF- cDHFR-link2-His <sub>6</sub> -MBP-<br>Rpn10 <sub>1-189,Q149A</sub> <sup>Sc</sup>                     | This work      |
| pND-Ub04          | ColE1            | Kan        | pLtetO1  | pZE21-nDHFR-link2-His <sub>6</sub> -<br>Ub <sup>Hs</sup> /Ubc4 <sup>Sc</sup> /Uba1 <sup>Ta</sup>           | This work      |
| pND-Ub18          | ColE1            | Kan        | pLtetO1  | pZE21-nDHFR-link2-His <sub>6</sub> -Ub <sup>Hs</sup>                                                       | This work      |
| pND-Ub22          | ColE1            | Kan        | pLtetO1  | pZE21-nDHFR-link2-<br>His <sub>6</sub> Ub <sub>I44E,L8E,V70D</sub> /UBC4 <sup>Sc</sup> /Uba1 <sup>Ta</sup> | This work      |
| pND-Ub44          | ColE1            | Kan        | pLtetO1  | pZE21-nDHFR-link2-His <sub>6</sub> -<br>Ub <sub>I44E</sub> /UBC4 <sup>Sc</sup> /Uba1 <sup>Ta</sup>         | This work      |
| pND-Ub55          | ColE1            | Kan        | pLtetO1  | pZE21-nDHFR-link2-His <sub>6</sub> -<br>Ub <sub>H68L</sub> /UBC4 <sup>Sc</sup> /Uba1 <sup>Ta</sup>         | This work      |
| pGST-DHFR         | ColE1            | Amp        | Ptac     | pGST-DHFR <sup>Mm</sup>                                                                                    | This work      |
| pCOG3             | ColE1            | Amp        | Ptac     | pMBP-par1-RSP5 <sup>Sc</sup>                                                                               | Lab collection |

<sup>a</sup> Our laboratory collection identifier; <sup>b</sup> Origin of replication; <sup>c</sup> Amp, ampicillin; <sup>d</sup> Sm, streptomycin; <sup>e</sup> Kan, kanamycin, <sup>f</sup> Tet, tetracycline, *Hs-Homo sapiens*, *Mm-Mus musculus*, *Sc- Saccharomyces cerevisiae*, *Ta-Triticum aestivum*.
